# Supplementary material
Source: publisher figshare collection journal article supplement (https://acs.figshare.com/ndownloader/files/5088985)
Supplement: Supplementary file 1 [file 5088985]

data_4211
 
_audit_creation_method            SHELXL-97
_chemical_name_systematic
;
 ?
;
_chemical_name_common             ?
_chemical_melting_point           ?
_chemical_formula_moiety          'C39 H37 Ir1 N2 O5'
_chemical_formula_sum             'C39 H37 Ir N2 O5'
_chemical_formula_weight          805.91
 
loop_
 _atom_type_symbol
 _atom_type_description
 _atom_type_scat_dispersion_real
 _atom_type_scat_dispersion_imag
 _atom_type_scat_source
 'C'  'C'   0.0033   0.0016
 'International Tables Vol C Tables 4.2.6.8 and 6.1.1.4'
 'H'  'H'   0.0000   0.0000
 'International Tables Vol C Tables 4.2.6.8 and 6.1.1.4'
 'Ir'  'Ir'  -1.4442   7.9887
 'International Tables Vol C Tables 4.2.6.8 and 6.1.1.4'
 'N'  'N'   0.0061   0.0033
 'International Tables Vol C Tables 4.2.6.8 and 6.1.1.4'
 'O'  'O'   0.0106   0.0060
 'International Tables Vol C Tables 4.2.6.8 and 6.1.1.4'
 
_symmetry_cell_setting            monoclinic
_symmetry_space_group_name_H-M    'C c'
 
loop_
 _symmetry_equiv_pos_as_xyz
 'x, y, z'
 'x, -y, z+1/2'
 'x+1/2, y+1/2, z'
 'x+1/2, -y+1/2, z+1/2'
 
_cell_length_a                    20.9550(2)
_cell_length_b                    15.5250(2)
_cell_length_c                    21.8250(2)
_cell_angle_alpha                 90.00
_cell_angle_beta                  101.2710(10)
_cell_angle_gamma                 90.00
_cell_volume                      6963.31(13)
_cell_formula_units_Z             8
_cell_measurement_temperature     200(2)
_cell_measurement_reflns_used     29718
_cell_measurement_theta_min       2.037
_cell_measurement_theta_max       25.028
 
_exptl_crystal_description        prism
_exptl_crystal_colour             orange-red
_exptl_crystal_size_max           0.32
_exptl_crystal_size_mid           0.2
_exptl_crystal_size_min           0.12
_exptl_crystal_density_meas       ?
_exptl_crystal_density_diffrn     1.537
_exptl_crystal_density_method     'not measured'
_exptl_crystal_F_000              3216
_exptl_absorpt_coefficient_mu     3.880
_exptl_absorpt_correction_type    multi-scan
_exptl_absorpt_correction_T_min   0.3353
_exptl_absorpt_correction_T_max   0.5493
_exptl_absorpt_process_details
;
 ?
;
 
_exptl_special_details
;
 ?
;
 
_diffrn_ambient_temperature       200(2)
_diffrn_radiation_wavelength      0.71073
_diffrn_radiation_type            MoK\a
_diffrn_radiation_source          'fine-focus sealed tube'
_diffrn_radiation_monochromator   graphite
_diffrn_measurement_device_type   KappaCCD
_diffrn_measurement_method        'CCD rotation images, thick slices'
_diffrn_detector_area_resol_mean  9
_diffrn_standards_number          ?
_diffrn_standards_interval_count  ?
_diffrn_standards_interval_time   ?
_diffrn_standards_decay_%         ?
_diffrn_reflns_number             34951
_diffrn_reflns_av_R_equivalents   0.0567
_diffrn_reflns_av_sigmaI/netI     0.0497
_diffrn_reflns_limit_h_min        -24
_diffrn_reflns_limit_h_max        24
_diffrn_reflns_limit_k_min        -18
_diffrn_reflns_limit_k_max        18
_diffrn_reflns_limit_l_min        -25
_diffrn_reflns_limit_l_max        25
_diffrn_reflns_theta_min          2.36
_diffrn_reflns_theta_max          25.02
_reflns_number_total              11687
_reflns_number_gt                 11068
_reflns_threshold_expression      >2sigma(I)
 
_computing_data_collection        'Collect (Nonius BV, 1997-2000)'
_computing_cell_refinement      'HKL Scalepack (Otwinowski & Minor 1997)'
_computing_data_reduction       'HKL Denzo and Scalepack (Otwinowski & Minor 19'
_computing_structure_solution     'SHELXS-86 (Sheldrick, 1986)'
_computing_structure_refinement   'SHELXL-97 (Sheldrick, 1997)'
_computing_molecular_graphics     'Ortep-3 for Windows (Farrugia, 1997)'
_computing_publication_material   'WinGX publication routines (Farrugia, 1999)'
 
_refine_special_details
;
 Refinement of F^2^ against ALL reflections.  The weighted R-factor wR and
 goodness of fit S are based on F^2^, conventional R-factors R are based
 on F, with F set to zero for negative F^2^. The threshold expression of
 F^2^ > 2sigma(F^2^) is used only for calculating R-factors(gt) etc. and is
 not relevant to the choice of reflections for refinement.  R-factors based
 on F^2^ are statistically about twice as large as those based on F, and R-
 factors based on ALL data will be even larger.
;
 
_refine_ls_structure_factor_coef  Fsqd
_refine_ls_matrix_type            full
_refine_ls_weighting_scheme       calc
_refine_ls_weighting_details
 'calc w=1/[\s^2^(Fo^2^)+(0.0811P)^2^+119.6013P] where P=(Fo^2^+2Fc^2^)/3'
_atom_sites_solution_primary      direct
_atom_sites_solution_secondary    difmap
_atom_sites_solution_hydrogens    geom
_refine_ls_hydrogen_treatment     fixed
_refine_ls_extinction_method      none
_refine_ls_extinction_coef        ?
_refine_ls_abs_structure_details
 'Flack H D (1983), Acta Cryst. A39, 876-881'
_refine_ls_abs_structure_Flack    0.940(13)
_refine_ls_number_reflns          11687
_refine_ls_number_parameters      847
_refine_ls_number_restraints      2
_refine_ls_R_factor_all           0.0551
_refine_ls_R_factor_gt            0.0492
_refine_ls_wR_factor_ref          0.1446
_refine_ls_wR_factor_gt           0.1337
_refine_ls_goodness_of_fit_ref    1.092
_refine_ls_restrained_S_all       1.092
_refine_ls_shift/su_max           0.001
_refine_ls_shift/su_mean          0.000
 
loop_
 _atom_site_label
 _atom_site_type_symbol
 _atom_site_fract_x
 _atom_site_fract_y
 _atom_site_fract_z
 _atom_site_U_iso_or_equiv
 _atom_site_adp_type
 _atom_site_occupancy
 _atom_site_symmetry_multiplicity
 _atom_site_calc_flag
 _atom_site_refinement_flags
 _atom_site_disorder_assembly
 _atom_site_disorder_group
Ir1 Ir -0.01408(2) 0.02499(3) 0.016032(19) 0.02200(12) Uani 1 1 d . . .
Ir2 Ir 0.457684(19) 0.06816(3) 0.365983(18) 0.02198(12) Uani 1 1 d . . .
O1 O 0.1900(5) 0.0051(8) -0.2488(5) 0.047(3) Uani 1 1 d . . .
O2 O -0.0451(7) 0.2043(8) 0.3372(5) 0.062(3) Uani 1 1 d . . .
O3 O -0.0910(4) 0.1182(6) 0.0173(4) 0.031(2) Uani 1 1 d . . .
O4 O -0.0888(5) -0.0610(6) -0.0296(5) 0.033(2) Uani 1 1 d . . .
O5 O 0.2639(6) 0.0638(8) 0.6392(5) 0.055(3) Uani 1 1 d . . .
O6 O 0.4417(6) 0.2365(7) 0.0328(5) 0.049(3) Uani 1 1 d . . .
O7 O 0.5366(4) 0.1557(6) 0.3636(4) 0.032(2) Uani 1 1 d . . .
O8 O 0.5284(5) -0.0263(5) 0.4087(5) 0.031(2) Uani 1 1 d . . .
O9 O 0.2149(10) 0.4927(14) 0.1416(9) 0.130(8) Uani 1 1 d . . .
H9A H 0.2444 0.5186 0.1185 0.156 Uiso 1 1 d R . .
H9B H 0.2082 0.5186 0.1798 0.156 Uiso 1 1 d R . .
O10 O 0.2019(9) 0.5459(10) 0.2615(9) 0.095(5) Uani 1 1 d . . .
H10A H 0.2420 0.5705 0.2547 0.114 Uiso 1 1 d R . .
H10B H 0.1800 0.5705 0.2920 0.114 Uiso 1 1 d R . .
N1 N 0.0046(5) 0.0579(7) -0.0684(5) 0.025(2) Uani 1 1 d . . .
N2 N -0.0296(5) -0.0019(8) 0.1037(5) 0.027(2) Uani 1 1 d . . .
N3 N 0.4447(6) 0.0989(8) 0.4533(5) 0.031(2) Uani 1 1 d . . .
N4 N 0.4662(6) 0.0445(8) 0.2751(6) 0.030(3) Uani 1 1 d . . .
C1 C -0.0279(7) 0.1240(8) -0.1023(7) 0.032(3) Uani 1 1 d . . .
H1 H -0.0626 0.1522 -0.0872 0.039 Uiso 1 1 d R . .
C2 C -0.0132(7) 0.1493(9) -0.1573(6) 0.037(3) Uani 1 1 d . . .
H2 H -0.0364 0.1958 -0.1807 0.045 Uiso 1 1 d R . .
C3 C 0.0360(7) 0.1094(9) -0.1811(6) 0.031(3) Uani 1 1 d . . .
C4 C 0.0524(8) 0.1366(9) -0.2381(7) 0.036(3) Uani 1 1 d . . .
H4 H 0.0273 0.1811 -0.2622 0.044 Uiso 1 1 d R . .
C5 C 0.1026(7) 0.1003(10) -0.2591(6) 0.038(3) Uani 1 1 d . . .
H5 H 0.1142 0.1188 -0.2975 0.045 Uiso 1 1 d R . .
C6 C 0.1404(7) 0.0344(9) -0.2232(6) 0.033(3) Uani 1 1 d . . .
C7 C 0.2293(9) -0.0634(11) -0.2145(9) 0.054(5) Uani 1 1 d . . .
H7A H 0.2627 -0.0784 -0.2371 0.065 Uiso 1 1 d R . .
H7B H 0.2020 -0.1124 -0.2124 0.065 Uiso 1 1 d R . .
H7C H 0.2490 -0.0456 -0.1729 0.065 Uiso 1 1 d R . .
C8 C 0.1254(7) 0.0068(10) -0.1693(7) 0.034(3) Uani 1 1 d . . .
H8 H 0.1507 -0.0361 -0.1467 0.041 Uiso 1 1 calc R . .
C9 C 0.0719(6) 0.0411(9) -0.1457(6) 0.028(3) Uani 1 1 d . . .
C10 C 0.0525(6) 0.0138(8) -0.0893(6) 0.025(3) Uani 1 1 d . . .
C11 C 0.0805(7) -0.0566(9) -0.0459(7) 0.032(3) Uani 1 1 d . . .
C12 C 0.1236(7) -0.1198(9) -0.0570(7) 0.044(4) Uani 1 1 d . . .
H12 H 0.1357 -0.1227 -0.0958 0.053 Uiso 1 1 calc R . .
C13 C 0.1497(8) -0.1807(10) -0.0092(8) 0.050(4) Uani 1 1 d . . .
H13 H 0.1823 -0.2207 -0.0166 0.060 Uiso 1 1 d R . .
C14 C 0.1267(8) -0.1826(9) 0.0462(7) 0.042(4) Uani 1 1 d . . .
C15 C 0.1526(9) -0.2469(10) 0.0960(8) 0.053(4) Uani 1 1 d . . .
H15A H 0.1322 -0.2386 0.1313 0.063 Uiso 1 1 d R . .
H15B H 0.1988 -0.2398 0.1088 0.063 Uiso 1 1 d R . .
H15C H 0.1433 -0.3038 0.0796 0.063 Uiso 1 1 d R . .
C16 C 0.0790(7) -0.1231(8) 0.0540(6) 0.034(3) Uani 1 1 d . . .
H16 H 0.0621 -0.1273 0.0917 0.040 Uiso 1 1 d R . .
C17 C 0.0551(7) -0.0597(8) 0.0096(7) 0.029(3) Uani 1 1 d . . .
C18 C 0.0501(6) 0.1055(8) 0.0648(6) 0.027(3) Uani 1 1 d . . .
C19 C 0.0988(7) 0.1515(8) 0.0444(6) 0.030(3) Uani 1 1 d . . .
H19 H 0.1044 0.1447 0.0020 0.036 Uiso 1 1 d R . .
C20 C 0.1411(6) 0.2050(10) 0.0841(7) 0.041(3) Uani 1 1 d . . .
C21 C 0.1915(9) 0.2566(13) 0.0595(9) 0.067(5) Uani 1 1 d . . .
H21A H 0.1887 0.2471 0.0156 0.080 Uiso 1 1 d R . .
H21B H 0.2332 0.2378 0.0820 0.080 Uiso 1 1 d R . .
H21C H 0.1863 0.3169 0.0671 0.080 Uiso 1 1 d R . .
C22 C 0.1363(8) 0.2102(11) 0.1460(8) 0.049(4) Uani 1 1 d . . .
H22 H 0.1660 0.2469 0.1733 0.059 Uiso 1 1 d R . .
C23 C 0.0887(7) 0.1641(10) 0.1685(6) 0.040(3) Uani 1 1 d . . .
H23 H 0.0873 0.1667 0.2122 0.048 Uiso 1 1 d R . .
C24 C 0.0446(6) 0.1130(8) 0.1289(6) 0.028(3) Uani 1 1 d . . .
C25 C -0.0068(6) 0.0585(8) 0.1473(6) 0.026(3) Uani 1 1 d . . .
C26 C -0.0340(7) 0.0640(8) 0.2039(6) 0.030(3) Uani 1 1 d . . .
C27 C -0.0223(8) 0.1345(9) 0.2443(6) 0.038(3) Uani 1 1 d . . .
H27 H 0.0055 0.1805 0.2359 0.046 Uiso 1 1 d R . .
C28 C -0.0517(8) 0.1366(10) 0.2961(7) 0.045(4) Uani 1 1 d . . .
C29 C -0.0068(11) 0.2740(11) 0.3264(8) 0.062(5) Uani 1 1 d . . .
H29A H -0.0064 0.3162 0.3585 0.075 Uiso 1 1 d R . .
H29B H -0.0252 0.2987 0.2865 0.075 Uiso 1 1 d R . .
H29C H 0.0369 0.2555 0.3263 0.075 Uiso 1 1 d R . .
C30 C -0.0911(8) 0.0685(10) 0.3083(7) 0.044(4) Uani 1 1 d . . .
H30 H -0.1104 0.0716 0.3447 0.053 Uiso 1 1 d R . .
C31 C -0.1033(9) 0.0009(11) 0.2693(7) 0.048(4) Uani 1 1 d . . .
H31 H -0.1297 -0.0460 0.2786 0.058 Uiso 1 1 d R . .
C32 C -0.0756(8) -0.0020(11) 0.2148(8) 0.042(4) Uani 1 1 d . . .
C33 C -0.0897(8) -0.0701(8) 0.1713(7) 0.038(4) Uani 1 1 d . . .
H33 H -0.1137 -0.1197 0.1803 0.046 Uiso 1 1 d R . .
C34 C -0.0687(9) -0.0665(9) 0.1165(9) 0.039(4) Uani 1 1 d . . .
H34 H -0.0829 -0.1095 0.0852 0.047 Uiso 1 1 d R . .
C35 C -0.1504(7) 0.0994(10) 0.0085(7) 0.038(3) Uani 1 1 d . . .
C36 C -0.1943(8) 0.1728(12) 0.0229(10) 0.063(5) Uani 1 1 d . . .
H36A H -0.2383 0.1519 0.0146 0.075 Uiso 1 1 d R . .
H36B H -0.1913 0.2229 -0.0022 0.075 Uiso 1 1 d R . .
H36C H -0.1819 0.1876 0.0663 0.075 Uiso 1 1 d R . .
C37 C -0.1790(8) 0.0225(10) -0.0125(9) 0.047(4) Uani 1 1 d . . .
H37 H -0.2245 0.0145 -0.0132 0.056 Uiso 1 1 d R . .
C38 C -0.1500(9) -0.0509(11) -0.0315(8) 0.043(4) Uani 1 1 d . . .
C39 C -0.1900(8) -0.1277(11) -0.0537(10) 0.064(5) Uani 1 1 d . . .
H39A H -0.2349 -0.1168 -0.0525 0.077 Uiso 1 1 d R . .
H39B H -0.1752 -0.1769 -0.0281 0.077 Uiso 1 1 d R . .
H39C H -0.1857 -0.1389 -0.0959 0.077 Uiso 1 1 d R . .
C40 C 0.4839(7) 0.1629(9) 0.4875(7) 0.035(3) Uani 1 1 d . . .
H40 H 0.5182 0.1895 0.4709 0.042 Uiso 1 1 d R . .
C41 C 0.4737(7) 0.1860(10) 0.5441(6) 0.037(3) Uani 1 1 d . . .
H41 H 0.5028 0.2257 0.5693 0.045 Uiso 1 1 d R . .
C42 C 0.4220(7) 0.1521(9) 0.5679(6) 0.035(3) Uani 1 1 d . . .
C43 C 0.4082(8) 0.1791(10) 0.6263(7) 0.044(4) Uani 1 1 d . . .
H43 H 0.4353 0.2208 0.6513 0.053 Uiso 1 1 d R . .
C44 C 0.3578(9) 0.1475(11) 0.6486(7) 0.050(4) Uani 1 1 d . . .
H44 H 0.3519 0.1649 0.6893 0.060 Uiso 1 1 d R . .
C45 C 0.3148(8) 0.0881(11) 0.6131(7) 0.042(3) Uani 1 1 d . . .
C46 C 0.2231(8) -0.0046(12) 0.6091(8) 0.049(4) Uani 1 1 d . . .
H46A H 0.1888 -0.0160 0.6314 0.059 Uiso 1 1 d R . .
H46B H 0.2498 -0.0550 0.6098 0.059 Uiso 1 1 d R . .
H46C H 0.2047 0.0103 0.5666 0.059 Uiso 1 1 d R . .
C47 C 0.3255(7) 0.0601(10) 0.5552(7) 0.037(3) Uani 1 1 d . . .
H47 H 0.2956 0.0208 0.5305 0.045 Uiso 1 1 d R . .
C48 C 0.3802(7) 0.0880(9) 0.5327(6) 0.030(3) Uani 1 1 d . . .
C49 C 0.3961(7) 0.0595(8) 0.4755(6) 0.028(3) Uani 1 1 d . . .
C50 C 0.3655(7) -0.0101(8) 0.4328(6) 0.026(3) Uani 1 1 d . . .
C51 C 0.3217(7) -0.0721(9) 0.4451(7) 0.040(3) Uani 1 1 d . . .
H51 H 0.3096 -0.0725 0.4853 0.048 Uiso 1 1 d R . .
C52 C 0.2966(7) -0.1324(9) 0.4026(7) 0.039(3) Uani 1 1 d . . .
H52 H 0.2663 -0.1740 0.4125 0.047 Uiso 1 1 d R . .
C53 C 0.3144(7) -0.1331(9) 0.3433(7) 0.035(3) Uani 1 1 d . . .
C54 C 0.2832(8) -0.1993(12) 0.2948(7) 0.050(4) Uani 1 1 d . . .
H54A H 0.2997 -0.1932 0.2569 0.060 Uiso 1 1 d R . .
H54B H 0.2370 -0.1902 0.2860 0.060 Uiso 1 1 d R . .
H54C H 0.2926 -0.2562 0.3113 0.060 Uiso 1 1 d R . .
C55 C 0.3575(7) -0.0749(8) 0.3311(6) 0.029(3) Uani 1 1 d . . .
H55 H 0.3676 -0.0770 0.2901 0.035 Uiso 1 1 d R . .
C56 C 0.3855(6) -0.0131(8) 0.3744(6) 0.023(3) Uani 1 1 d . . .
C57 C 0.3940(6) 0.1523(8) 0.3205(6) 0.027(3) Uani 1 1 d . . .
C58 C 0.3515(6) 0.2059(8) 0.3455(6) 0.031(3) Uani 1 1 d . . .
H58 H 0.3543 0.2012 0.3898 0.037 Uiso 1 1 d R . .
C59 C 0.3104(7) 0.2619(9) 0.3113(7) 0.036(3) Uani 1 1 d . . .
C60 C 0.2632(9) 0.3185(11) 0.3403(8) 0.059(5) Uani 1 1 d . . .
H60A H 0.2392 0.3537 0.3076 0.071 Uiso 1 1 d R . .
H60B H 0.2857 0.3547 0.3733 0.071 Uiso 1 1 d R . .
H60C H 0.2337 0.2814 0.3564 0.071 Uiso 1 1 d R . .
C61 C 0.3063(6) 0.2638(10) 0.2464(7) 0.039(3) Uani 1 1 d . . .
H61 H 0.2759 0.3019 0.2211 0.047 Uiso 1 1 d R . .
C62 C 0.3465(6) 0.2128(9) 0.2197(6) 0.032(3) Uani 1 1 d . . .
H62 H 0.3418 0.2139 0.1750 0.038 Uiso 1 1 d R . .
C63 C 0.3930(6) 0.1590(8) 0.2551(6) 0.027(3) Uani 1 1 d . . .
C64 C 0.4379(7) 0.1026(9) 0.2322(6) 0.032(3) Uani 1 1 d . . .
C65 C 0.4567(7) 0.1031(9) 0.1715(7) 0.035(3) Uani 1 1 d . . .
C66 C 0.4411(7) 0.1703(9) 0.1287(6) 0.036(3) Uani 1 1 d . . .
H66 H 0.4172 0.2193 0.1388 0.043 Uiso 1 1 d R . .
C67 C 0.4597(8) 0.1660(10) 0.0716(7) 0.040(3) Uani 1 1 d . . .
C68 C 0.4597(8) 0.2344(10) -0.0273(6) 0.044(4) Uani 1 1 d . . .
H68A H 0.4444 0.2860 -0.0496 0.053 Uiso 1 1 d R . .
H68B H 0.4407 0.1852 -0.0506 0.053 Uiso 1 1 d R . .
H68C H 0.5063 0.2315 -0.0219 0.053 Uiso 1 1 d R . .
C69 C 0.4940(7) 0.0965(9) 0.0543(6) 0.039(3) Uani 1 1 d . . .
H69 H 0.5028 0.0901 0.0130 0.046 Uiso 1 1 d R . .
C70 C 0.5141(8) 0.0339(9) 0.0979(7) 0.044(4) Uani 1 1 d . . .
H70 H 0.5417 -0.0120 0.0893 0.053 Uiso 1 1 d R . .
C71 C 0.4968(8) 0.0357(9) 0.1571(7) 0.038(4) Uani 1 1 d . . .
C72 C 0.5207(9) -0.0255(10) 0.2034(8) 0.044(4) Uani 1 1 d . . .
H72 H 0.5482 -0.0713 0.1943 0.053 Uiso 1 1 d R . .
C73 C 0.5065(9) -0.0199(8) 0.2602(9) 0.035(4) Uani 1 1 d . . .
H73 H 0.5238 -0.0610 0.2919 0.042 Uiso 1 1 d R . .
C74 C 0.5960(7) 0.1389(10) 0.3808(8) 0.042(4) Uani 1 1 d . . .
C75 C 0.6412(7) 0.2117(11) 0.3729(10) 0.064(5) Uani 1 1 d . . .
H75A H 0.6859 0.1955 0.3868 0.077 Uiso 1 1 d R . .
H75B H 0.6312 0.2596 0.3972 0.077 Uiso 1 1 d R . .
H75C H 0.6342 0.2279 0.3296 0.077 Uiso 1 1 d R . .
C76 C 0.6223(9) 0.0605(11) 0.4088(12) 0.068(7) Uani 1 1 d . . .
H76 H 0.6690 0.0613 0.4188 0.081 Uiso 1 1 d R . .
C77 C 0.5896(7) -0.0135(10) 0.4195(9) 0.042(4) Uani 1 1 d . . .
C78 C 0.6283(9) -0.0921(13) 0.4482(11) 0.072(6) Uani 1 1 d . . .
H78A H 0.5993 -0.1376 0.4547 0.086 Uiso 1 1 d R . .
H78B H 0.6557 -0.0771 0.4873 0.086 Uiso 1 1 d R . .
H78C H 0.6547 -0.1111 0.4195 0.086 Uiso 1 1 d R . .
 
loop_
 _atom_site_aniso_label
 _atom_site_aniso_U_11
 _atom_site_aniso_U_22
 _atom_site_aniso_U_33
 _atom_site_aniso_U_23
 _atom_site_aniso_U_13
 _atom_site_aniso_U_12
Ir1 0.0236(2) 0.0225(2) 0.0206(2) -0.00132(19) 0.00610(17) 0.0027(2)
Ir2 0.0228(2) 0.0224(2) 0.0215(2) 0.00228(19) 0.00618(17) -0.00419(19)
O1 0.041(6) 0.066(7) 0.040(6) 0.011(5) 0.020(5) 0.013(5)
O2 0.110(11) 0.054(7) 0.027(5) -0.006(5) 0.027(6) -0.006(7)
O3 0.025(5) 0.032(5) 0.036(5) -0.001(4) 0.007(4) 0.003(4)
O4 0.035(6) 0.034(6) 0.029(6) -0.007(4) 0.006(4) 0.004(4)
O5 0.058(7) 0.073(8) 0.042(6) -0.017(5) 0.030(6) -0.015(6)
O6 0.077(8) 0.042(6) 0.034(6) 0.012(4) 0.025(5) 0.014(5)
O7 0.030(5) 0.030(5) 0.037(5) 0.008(4) 0.011(4) -0.007(4)
O8 0.026(5) 0.028(6) 0.039(6) 0.013(4) 0.008(4) -0.002(4)
O9 0.130(17) 0.147(18) 0.101(14) -0.024(13) -0.001(12) 0.084(15)
O10 0.094(11) 0.074(9) 0.122(14) -0.019(9) 0.032(11) -0.009(9)
N1 0.026(6) 0.028(6) 0.020(5) -0.005(5) 0.003(4) 0.005(5)
N2 0.026(6) 0.027(6) 0.028(6) 0.000(5) 0.005(5) 0.005(5)
N3 0.039(6) 0.030(6) 0.023(6) -0.003(5) 0.002(5) -0.003(5)
N4 0.034(7) 0.029(6) 0.032(7) 0.005(5) 0.016(6) -0.004(5)
C1 0.039(8) 0.023(7) 0.035(8) 0.000(5) 0.009(6) 0.018(6)
C2 0.049(9) 0.033(7) 0.033(8) 0.010(6) 0.015(7) 0.004(6)
C3 0.037(7) 0.033(7) 0.023(6) 0.001(5) 0.009(5) 0.002(6)
C4 0.048(9) 0.034(7) 0.027(7) 0.006(6) 0.004(6) 0.001(6)
C5 0.037(8) 0.051(9) 0.027(7) 0.008(6) 0.009(6) -0.002(7)
C6 0.032(7) 0.047(8) 0.020(7) 0.005(5) 0.003(6) -0.006(6)
C7 0.043(9) 0.063(11) 0.063(12) -0.001(8) 0.026(9) 0.008(8)
C8 0.027(7) 0.044(7) 0.033(8) -0.007(6) 0.007(6) 0.001(6)
C9 0.025(6) 0.040(7) 0.022(6) -0.008(5) 0.008(5) -0.002(5)
C10 0.028(7) 0.025(6) 0.020(6) 0.001(5) 0.002(5) 0.007(5)
C11 0.033(7) 0.035(7) 0.029(7) 0.002(6) 0.009(6) 0.008(6)
C12 0.051(9) 0.040(8) 0.045(8) 0.009(7) 0.020(7) 0.025(7)
C13 0.054(9) 0.042(8) 0.059(10) 0.012(7) 0.025(8) 0.024(7)
C14 0.056(9) 0.025(7) 0.046(9) 0.004(6) 0.011(7) 0.012(7)
C15 0.067(11) 0.031(8) 0.059(10) 0.005(7) 0.011(8) 0.018(7)
C16 0.043(8) 0.024(7) 0.033(7) -0.004(5) 0.007(6) 0.003(6)
C17 0.032(7) 0.024(6) 0.030(7) 0.001(5) 0.006(6) 0.002(5)
C18 0.027(6) 0.029(6) 0.029(7) 0.004(5) 0.011(5) 0.010(5)
C19 0.036(7) 0.028(6) 0.028(7) 0.000(5) 0.010(6) -0.001(6)
C20 0.023(7) 0.054(9) 0.041(8) -0.008(7) -0.008(6) -0.006(6)
C21 0.065(11) 0.072(12) 0.063(11) -0.008(9) 0.012(9) -0.031(10)
C22 0.044(9) 0.055(9) 0.048(9) -0.013(7) 0.005(7) -0.012(7)
C23 0.037(7) 0.052(9) 0.028(7) -0.012(6) 0.000(6) -0.001(7)
C24 0.028(6) 0.029(6) 0.032(7) 0.000(5) 0.013(5) -0.001(5)
C25 0.028(7) 0.029(7) 0.025(7) -0.001(5) 0.012(6) 0.003(5)
C26 0.040(8) 0.025(7) 0.023(7) 0.007(5) -0.002(6) 0.003(5)
C27 0.061(9) 0.032(7) 0.023(7) 0.006(6) 0.014(7) 0.010(7)
C28 0.062(10) 0.045(9) 0.030(8) -0.007(6) 0.017(7) 0.010(7)
C29 0.108(16) 0.039(9) 0.048(10) -0.014(8) 0.038(10) -0.012(9)
C30 0.051(9) 0.055(10) 0.028(8) 0.007(7) 0.013(7) 0.004(7)
C31 0.066(11) 0.045(9) 0.037(9) 0.003(7) 0.018(8) 0.001(8)
C32 0.039(8) 0.051(9) 0.040(8) 0.007(7) 0.015(7) 0.008(7)
C33 0.059(10) 0.026(7) 0.035(8) 0.002(5) 0.022(7) -0.003(6)
C34 0.042(9) 0.032(9) 0.047(10) 0.001(6) 0.015(8) -0.008(6)
C35 0.028(7) 0.049(9) 0.039(8) -0.003(7) 0.008(6) 0.010(6)
C36 0.045(9) 0.057(11) 0.088(14) -0.022(10) 0.015(9) 0.004(8)
C37 0.027(8) 0.043(10) 0.066(11) -0.012(7) -0.001(7) 0.002(6)
C38 0.044(10) 0.041(8) 0.044(9) -0.001(7) 0.002(7) 0.001(7)
C39 0.044(10) 0.041(9) 0.102(16) -0.017(10) 0.003(10) -0.009(8)
C40 0.035(7) 0.033(7) 0.039(8) 0.004(6) 0.011(6) -0.005(6)
C41 0.043(8) 0.043(8) 0.023(7) -0.010(6) -0.002(6) -0.020(6)
C42 0.034(7) 0.037(7) 0.031(7) -0.001(6) -0.001(6) -0.005(6)
C43 0.057(10) 0.046(9) 0.027(7) -0.008(6) 0.001(7) -0.007(7)
C44 0.077(12) 0.053(9) 0.024(7) -0.004(6) 0.020(8) -0.002(8)
C45 0.040(8) 0.052(9) 0.038(8) -0.003(7) 0.017(7) -0.002(7)
C46 0.043(9) 0.074(11) 0.036(8) -0.006(8) 0.023(7) -0.011(8)
C47 0.036(8) 0.054(9) 0.025(7) -0.007(6) 0.013(6) -0.010(6)
C48 0.038(8) 0.028(6) 0.022(7) -0.002(5) 0.000(6) 0.001(6)
C49 0.027(7) 0.033(7) 0.025(7) 0.005(5) 0.013(6) -0.006(5)
C50 0.033(7) 0.021(6) 0.023(6) -0.001(5) 0.002(5) -0.001(5)
C51 0.042(8) 0.046(8) 0.038(8) 0.002(6) 0.023(7) -0.016(7)
C52 0.044(8) 0.036(7) 0.038(8) 0.001(6) 0.010(7) -0.013(6)
C53 0.034(7) 0.030(7) 0.038(8) 0.000(6) 0.002(6) -0.010(6)
C54 0.053(9) 0.066(11) 0.033(8) -0.013(7) 0.013(7) -0.022(8)
C55 0.041(8) 0.031(7) 0.016(6) -0.005(5) 0.006(6) -0.013(6)
C56 0.022(6) 0.028(6) 0.017(6) 0.008(5) -0.003(5) -0.002(5)
C57 0.026(6) 0.032(6) 0.023(6) 0.001(5) 0.002(5) -0.011(5)
C58 0.029(7) 0.026(6) 0.036(7) 0.002(5) 0.005(6) -0.006(5)
C59 0.029(7) 0.035(7) 0.048(8) 0.002(6) 0.014(6) 0.003(6)
C60 0.070(11) 0.057(10) 0.056(10) 0.011(8) 0.022(9) 0.023(9)
C61 0.021(6) 0.053(9) 0.041(8) 0.011(6) 0.003(6) 0.003(6)
C62 0.029(7) 0.042(7) 0.024(6) 0.005(5) 0.003(5) -0.003(6)
C63 0.030(6) 0.027(6) 0.026(6) 0.002(5) 0.007(5) -0.014(5)
C64 0.037(7) 0.030(7) 0.030(7) 0.000(5) 0.012(6) -0.012(6)
C65 0.035(8) 0.037(8) 0.037(8) 0.000(6) 0.014(6) -0.015(6)
C66 0.050(8) 0.031(7) 0.034(7) 0.004(6) 0.025(7) 0.005(6)
C67 0.046(8) 0.041(8) 0.034(8) -0.006(6) 0.011(7) -0.004(7)
C68 0.058(10) 0.046(8) 0.031(8) 0.003(6) 0.014(7) 0.002(7)
C69 0.051(9) 0.035(7) 0.029(7) -0.003(6) 0.008(7) -0.001(7)
C70 0.063(10) 0.032(8) 0.042(9) -0.002(6) 0.022(8) 0.012(7)
C71 0.059(10) 0.027(7) 0.034(8) 0.000(6) 0.024(7) -0.007(6)
C72 0.053(10) 0.038(9) 0.046(10) -0.005(6) 0.021(8) 0.001(7)
C73 0.042(9) 0.026(8) 0.037(9) 0.010(6) 0.010(8) 0.002(6)
C74 0.030(8) 0.041(9) 0.054(10) 0.015(7) 0.003(7) -0.005(6)
C75 0.027(8) 0.054(10) 0.111(16) 0.040(10) 0.009(9) -0.010(7)
C76 0.026(9) 0.043(10) 0.126(19) 0.036(11) -0.007(10) -0.006(7)
C77 0.019(7) 0.042(8) 0.063(11) 0.016(7) 0.001(7) 0.002(6)
C78 0.042(10) 0.064(12) 0.112(17) 0.053(12) 0.019(10) 0.016(9)
 
_geom_special_details
;
 All esds (except the esd in the dihedral angle between two l.s. planes)
 are estimated using the full covariance matrix.  The cell esds are taken
 into account individually in the estimation of esds in distances, angles
 and torsion angles; correlations between esds in cell parameters are only
 used when they are defined by crystal symmetry.  An approximate (isotropic)
 treatment of cell esds is used for estimating esds involving l.s. planes.
;
 
loop_
 _geom_bond_atom_site_label_1
 _geom_bond_atom_site_label_2
 _geom_bond_distance
 _geom_bond_site_symmetry_2
 _geom_bond_publ_flag
Ir1 C17 1.983(13) . ?
Ir1 C18 1.986(14) . ?
Ir1 N1 2.024(11) . ?
Ir1 N2 2.046(11) . ?
Ir1 O4 2.149(10) . ?
Ir1 O3 2.170(9) . ?
Ir2 C57 1.989(13) . ?
Ir2 C56 2.006(12) . ?
Ir2 N3 2.033(11) . ?
Ir2 N4 2.058(13) . ?
Ir2 O7 2.149(9) . ?
Ir2 O8 2.162(9) . ?
O1 C6 1.352(18) . ?
O1 C7 1.46(2) . ?
O2 C28 1.372(18) . ?
O2 C29 1.39(2) . ?
O3 C35 1.257(17) . ?
O4 C38 1.28(2) . ?
O5 C45 1.357(18) . ?
O5 C46 1.44(2) . ?
O6 C67 1.390(19) . ?
O6 C68 1.433(16) . ?
O7 C74 1.257(17) . ?
O8 C77 1.273(18) . ?
O9 H9A 0.9599 . ?
O9 H9B 0.9600 . ?
O10 H10A 0.9601 . ?
O10 H10B 0.9601 . ?
N1 C10 1.364(17) . ?
N1 C1 1.367(17) . ?
N2 C25 1.356(17) . ?
N2 C34 1.358(19) . ?
N3 C49 1.355(17) . ?
N3 C40 1.407(18) . ?
N4 C64 1.352(19) . ?
N4 C73 1.388(19) . ?
C1 C2 1.354(19) . ?
C1 H1 0.9606 . ?
C2 C3 1.387(19) . ?
C2 H2 0.9598 . ?
C3 C4 1.417(19) . ?
C3 C9 1.44(2) . ?
C4 C5 1.35(2) . ?
C4 H4 0.9604 . ?
C5 C6 1.43(2) . ?
C5 H5 0.9610 . ?
C6 C8 1.35(2) . ?
C7 H7A 0.9606 . ?
C7 H7B 0.9583 . ?
C7 H7C 0.9616 . ?
C8 C9 1.425(19) . ?
C8 H8 0.9300 . ?
C9 C10 1.434(18) . ?
C10 C11 1.489(18) . ?
C11 C12 1.387(19) . ?
C11 C17 1.41(2) . ?
C12 C13 1.44(2) . ?
C12 H12 0.9300 . ?
C13 C14 1.39(2) . ?
C13 H13 0.9599 . ?
C14 C16 1.39(2) . ?
C14 C15 1.50(2) . ?
C15 H15A 0.9600 . ?
C15 H15B 0.9601 . ?
C15 H15C 0.9587 . ?
C16 C17 1.404(19) . ?
C16 H16 0.9595 . ?
C18 C19 1.388(18) . ?
C18 C24 1.430(17) . ?
C19 C20 1.388(19) . ?
C19 H19 0.9611 . ?
C20 C22 1.38(2) . ?
C20 C21 1.51(2) . ?
C21 H21A 0.9598 . ?
C21 H21B 0.9603 . ?
C21 H21C 0.9606 . ?
C22 C23 1.39(2) . ?
C22 H22 0.9602 . ?
C23 C24 1.386(19) . ?
C23 H23 0.9608 . ?
C24 C25 1.486(17) . ?
C25 C26 1.460(19) . ?
C26 C32 1.40(2) . ?
C26 C27 1.397(19) . ?
C27 C28 1.390(19) . ?
C27 H27 0.9604 . ?
C28 C30 1.40(2) . ?
C29 H29A 0.9580 . ?
C29 H29B 0.9606 . ?
C29 H29C 0.9601 . ?
C30 C31 1.34(2) . ?
C30 H30 0.9605 . ?
C31 C32 1.42(2) . ?
C31 H31 0.9598 . ?
C32 C33 1.41(2) . ?
C33 C34 1.35(2) . ?
C33 H33 0.9608 . ?
C34 H34 0.9599 . ?
C35 C37 1.37(2) . ?
C35 C36 1.53(2) . ?
C36 H36A 0.9607 . ?
C36 H36B 0.9605 . ?
C36 H36C 0.9598 . ?
C37 C38 1.39(2) . ?
C37 H37 0.9587 . ?
C38 C39 1.48(2) . ?
C39 H39A 0.9614 . ?
C39 H39B 0.9613 . ?
C39 H39C 0.9587 . ?
C40 C41 1.343(19) . ?
C40 H40 0.9593 . ?
C41 C42 1.394(19) . ?
C41 H41 0.9608 . ?
C42 C43 1.42(2) . ?
C42 C48 1.444(19) . ?
C43 C44 1.34(2) . ?
C43 H43 0.9581 . ?
C44 C45 1.41(2) . ?
C44 H44 0.9593 . ?
C45 C47 1.40(2) . ?
C46 H46A 0.9599 . ?
C46 H46B 0.9601 . ?
C46 H46C 0.9606 . ?
C47 C48 1.40(2) . ?
C47 H47 0.9609 . ?
C48 C49 1.425(19) . ?
C49 C50 1.488(18) . ?
C50 C51 1.392(18) . ?
C50 C56 1.419(18) . ?
C51 C52 1.35(2) . ?
C51 H51 0.9597 . ?
C52 C53 1.41(2) . ?
C52 H52 0.9595 . ?
C53 C55 1.341(19) . ?
C53 C54 1.53(2) . ?
C54 H54A 0.9615 . ?
C54 H54B 0.9599 . ?
C54 H54C 0.9597 . ?
C55 C56 1.393(18) . ?
C55 H55 0.9595 . ?
C57 C58 1.405(19) . ?
C57 C63 1.428(17) . ?
C58 C59 1.34(2) . ?
C58 H58 0.9599 . ?
C59 C61 1.40(2) . ?
C59 C60 1.55(2) . ?
C60 H60A 0.9594 . ?
C60 H60B 0.9614 . ?
C60 H60C 0.9602 . ?
C61 C62 1.368(19) . ?
C61 H61 0.9608 . ?
C62 C63 1.396(18) . ?
C62 H62 0.9613 . ?
C63 C64 1.444(18) . ?
C64 C65 1.455(18) . ?
C65 C66 1.40(2) . ?
C65 C71 1.41(2) . ?
C66 C67 1.378(19) . ?
C66 H66 0.9598 . ?
C67 C69 1.39(2) . ?
C68 H68A 0.9594 . ?
C68 H68B 0.9599 . ?
C68 H68C 0.9615 . ?
C69 C70 1.37(2) . ?
C69 H69 0.9599 . ?
C70 C71 1.41(2) . ?
C70 H70 0.9591 . ?
C71 C72 1.41(2) . ?
C72 C73 1.33(2) . ?
C72 H72 0.9601 . ?
C73 H73 0.9587 . ?
C74 C76 1.42(2) . ?
C74 C75 1.51(2) . ?
C75 H75A 0.9600 . ?
C75 H75B 0.9600 . ?
C75 H75C 0.9611 . ?
C76 C77 1.38(2) . ?
C76 H76 0.9602 . ?
C77 C78 1.53(2) . ?
C78 H78A 0.9601 . ?
C78 H78B 0.9596 . ?
C78 H78C 0.9598 . ?
 
loop_
 _geom_angle_atom_site_label_1
 _geom_angle_atom_site_label_2
 _geom_angle_atom_site_label_3
 _geom_angle
 _geom_angle_site_symmetry_1
 _geom_angle_site_symmetry_3
 _geom_angle_publ_flag
C17 Ir1 C18 91.6(5) . . ?
C17 Ir1 N1 80.1(5) . . ?
C18 Ir1 N1 95.6(5) . . ?
C17 Ir1 N2 100.6(5) . . ?
C18 Ir1 N2 80.9(5) . . ?
N1 Ir1 N2 176.5(5) . . ?
C17 Ir1 O4 91.9(5) . . ?
C18 Ir1 O4 174.4(4) . . ?
N1 Ir1 O4 89.3(4) . . ?
N2 Ir1 O4 94.1(4) . . ?
C17 Ir1 O3 176.7(5) . . ?
C18 Ir1 O3 90.0(4) . . ?
N1 Ir1 O3 96.9(4) . . ?
N2 Ir1 O3 82.5(4) . . ?
O4 Ir1 O3 86.8(4) . . ?
C57 Ir2 C56 90.8(5) . . ?
C57 Ir2 N3 96.5(5) . . ?
C56 Ir2 N3 79.7(5) . . ?
C57 Ir2 N4 79.2(5) . . ?
C56 Ir2 N4 100.6(5) . . ?
N3 Ir2 N4 175.7(5) . . ?
C57 Ir2 O7 90.9(4) . . ?
C56 Ir2 O7 176.3(4) . . ?
N3 Ir2 O7 96.9(4) . . ?
N4 Ir2 O7 83.0(4) . . ?
C57 Ir2 O8 175.7(5) . . ?
C56 Ir2 O8 90.0(4) . . ?
N3 Ir2 O8 87.8(4) . . ?
N4 Ir2 O8 96.5(5) . . ?
O7 Ir2 O8 88.5(3) . . ?
C6 O1 C7 115.8(11) . . ?
C28 O2 C29 118.1(12) . . ?
C35 O3 Ir1 124.0(9) . . ?
C38 O4 Ir1 124.9(10) . . ?
C45 O5 C46 117.4(12) . . ?
C67 O6 C68 116.8(12) . . ?
C74 O7 Ir2 125.7(9) . . ?
C77 O8 Ir2 123.7(9) . . ?
H9A O9 H9B 120.0 . . ?
H10A O10 H10B 120.0 . . ?
C10 N1 C1 121.2(11) . . ?
C10 N1 Ir1 117.6(9) . . ?
C1 N1 Ir1 121.1(9) . . ?
C25 N2 C34 120.7(12) . . ?
C25 N2 Ir1 114.6(9) . . ?
C34 N2 Ir1 123.8(11) . . ?
C49 N3 C40 122.0(12) . . ?
C49 N3 Ir2 118.5(9) . . ?
C40 N3 Ir2 119.4(9) . . ?
C64 N4 C73 121.5(11) . . ?
C64 N4 Ir2 116.1(10) . . ?
C73 N4 Ir2 121.7(9) . . ?
C2 C1 N1 121.4(13) . . ?
C2 C1 H1 119.4 . . ?
N1 C1 H1 119.2 . . ?
C1 C2 C3 121.1(13) . . ?
C1 C2 H2 120.7 . . ?
C3 C2 H2 118.2 . . ?
C2 C3 C4 121.4(13) . . ?
C2 C3 C9 118.5(12) . . ?
C4 C3 C9 120.1(12) . . ?
C5 C4 C3 120.8(13) . . ?
C5 C4 H4 119.6 . . ?
C3 C4 H4 119.6 . . ?
C4 C5 C6 119.9(13) . . ?
C4 C5 H5 121.2 . . ?
C6 C5 H5 118.9 . . ?
C8 C6 O1 125.8(13) . . ?
C8 C6 C5 120.5(14) . . ?
O1 C6 C5 113.7(12) . . ?
O1 C7 H7A 107.9 . . ?
O1 C7 H7B 108.7 . . ?
H7A C7 H7B 109.5 . . ?
O1 C7 H7C 111.8 . . ?
H7A C7 H7C 109.4 . . ?
H7B C7 H7C 109.5 . . ?
C6 C8 C9 122.1(14) . . ?
C6 C8 H8 118.9 . . ?
C9 C8 H8 118.9 . . ?
C8 C9 C10 125.0(13) . . ?
C8 C9 C3 116.6(12) . . ?
C10 C9 C3 118.3(11) . . ?
N1 C10 C9 119.2(11) . . ?
N1 C10 C11 112.3(11) . . ?
C9 C10 C11 128.4(12) . . ?
C12 C11 C17 119.6(13) . . ?
C12 C11 C10 126.6(12) . . ?
C17 C11 C10 113.7(12) . . ?
C11 C12 C13 120.4(13) . . ?
C11 C12 H12 119.8 . . ?
C13 C12 H12 119.8 . . ?
C14 C13 C12 120.0(13) . . ?
C14 C13 H13 120.9 . . ?
C12 C13 H13 119.1 . . ?
C13 C14 C16 118.1(13) . . ?
C13 C14 C15 120.5(14) . . ?
C16 C14 C15 121.3(14) . . ?
C14 C15 H15A 109.7 . . ?
C14 C15 H15B 109.7 . . ?
H15A C15 H15B 109.4 . . ?
C14 C15 H15C 109.0 . . ?
H15A C15 H15C 109.5 . . ?
H15B C15 H15C 109.5 . . ?
C14 C16 C17 123.2(13) . . ?
C14 C16 H16 116.9 . . ?
C17 C16 H16 119.9 . . ?
C16 C17 C11 118.1(12) . . ?
C16 C17 Ir1 125.7(11) . . ?
C11 C17 Ir1 116.2(10) . . ?
C19 C18 C24 118.4(12) . . ?
C19 C18 Ir1 128.0(9) . . ?
C24 C18 Ir1 113.5(9) . . ?
C18 C19 C20 121.9(13) . . ?
C18 C19 H19 119.2 . . ?
C20 C19 H19 118.9 . . ?
C22 C20 C19 119.1(14) . . ?
C22 C20 C21 120.7(14) . . ?
C19 C20 C21 120.2(14) . . ?
C20 C21 H21A 111.4 . . ?
C20 C21 H21B 106.7 . . ?
H21A C21 H21B 109.6 . . ?
C20 C21 H21C 110.2 . . ?
H21A C21 H21C 109.6 . . ?
H21B C21 H21C 109.3 . . ?
C20 C22 C23 120.8(14) . . ?
C20 C22 H22 118.7 . . ?
C23 C22 H22 120.5 . . ?
C24 C23 C22 120.6(13) . . ?
C24 C23 H23 119.9 . . ?
C22 C23 H23 119.5 . . ?
C23 C24 C18 119.1(12) . . ?
C23 C24 C25 125.9(12) . . ?
C18 C24 C25 114.9(11) . . ?
N2 C25 C26 119.4(12) . . ?
N2 C25 C24 112.2(11) . . ?
C26 C25 C24 128.3(12) . . ?
C32 C26 C27 120.5(14) . . ?
C32 C26 C25 117.5(13) . . ?
C27 C26 C25 121.9(12) . . ?
C28 C27 C26 118.7(14) . . ?
C28 C27 H27 121.3 . . ?
C26 C27 H27 120.1 . . ?
O2 C28 C27 123.1(15) . . ?
O2 C28 C30 116.3(13) . . ?
C27 C28 C30 120.6(14) . . ?
O2 C29 H29A 109.3 . . ?
O2 C29 H29B 108.7 . . ?
H29A C29 H29B 109.5 . . ?
O2 C29 H29C 110.4 . . ?
H29A C29 H29C 109.5 . . ?
H29B C29 H29C 109.4 . . ?
C31 C30 C28 121.0(15) . . ?
C31 C30 H30 120.3 . . ?
C28 C30 H30 118.6 . . ?
C30 C31 C32 119.8(16) . . ?
C30 C31 H31 120.2 . . ?
C32 C31 H31 119.9 . . ?
C26 C32 C33 119.4(14) . . ?
C26 C32 C31 119.3(16) . . ?
C33 C32 C31 121.3(15) . . ?
C34 C33 C32 120.1(14) . . ?
C34 C33 H33 119.1 . . ?
C32 C33 H33 120.8 . . ?
C33 C34 N2 121.6(15) . . ?
C33 C34 H34 119.4 . . ?
N2 C34 H34 118.9 . . ?
O3 C35 C37 127.4(14) . . ?
O3 C35 C36 114.3(14) . . ?
C37 C35 C36 118.3(14) . . ?
C35 C36 H36A 107.5 . . ?
C35 C36 H36B 112.1 . . ?
H36A C36 H36B 109.5 . . ?
C35 C36 H36C 108.8 . . ?
H36A C36 H36C 109.4 . . ?
H36B C36 H36C 109.5 . . ?
C35 C37 C38 128.6(16) . . ?
C35 C37 H37 119.1 . . ?
C38 C37 H37 112.3 . . ?
O4 C38 C37 125.5(16) . . ?
O4 C38 C39 114.2(15) . . ?
C37 C38 C39 120.3(16) . . ?
C38 C39 H39A 110.1 . . ?
C38 C39 H39B 110.6 . . ?
H39A C39 H39B 109.3 . . ?
C38 C39 H39C 107.9 . . ?
H39A C39 H39C 109.5 . . ?
H39B C39 H39C 109.5 . . ?
C41 C40 N3 119.7(12) . . ?
C41 C40 H40 119.8 . . ?
N3 C40 H40 120.4 . . ?
C40 C41 C42 121.1(12) . . ?
C40 C41 H41 120.1 . . ?
C42 C41 H41 118.8 . . ?
C41 C42 C43 122.1(13) . . ?
C41 C42 C48 119.8(12) . . ?
C43 C42 C48 118.1(13) . . ?
C44 C43 C42 122.1(14) . . ?
C44 C43 H43 117.4 . . ?
C42 C43 H43 120.4 . . ?
C43 C44 C45 120.2(13) . . ?
C43 C44 H44 119.2 . . ?
C45 C44 H44 120.6 . . ?
O5 C45 C47 125.0(14) . . ?
O5 C45 C44 114.9(13) . . ?
C47 C45 C44 120.2(14) . . ?
O5 C46 H46A 110.0 . . ?
O5 C46 H46B 107.6 . . ?
H46A C46 H46B 109.5 . . ?
O5 C46 H46C 110.7 . . ?
H46A C46 H46C 109.6 . . ?
H46B C46 H46C 109.5 . . ?
C45 C47 C48 120.6(14) . . ?
C45 C47 H47 120.2 . . ?
C48 C47 H47 119.2 . . ?
C47 C48 C49 124.0(13) . . ?
C47 C48 C42 118.6(12) . . ?
C49 C48 C42 117.3(13) . . ?
N3 C49 C48 119.6(12) . . ?
N3 C49 C50 111.5(11) . . ?
C48 C49 C50 128.9(12) . . ?
C51 C50 C56 118.2(12) . . ?
C51 C50 C49 127.0(12) . . ?
C56 C50 C49 114.8(11) . . ?
C52 C51 C50 122.0(13) . . ?
C52 C51 H51 119.1 . . ?
C50 C51 H51 118.9 . . ?
C51 C52 C53 119.8(13) . . ?
C51 C52 H52 119.9 . . ?
C53 C52 H52 120.3 . . ?
C55 C53 C52 119.0(12) . . ?
C55 C53 C54 121.9(13) . . ?
C52 C53 C54 119.1(12) . . ?
C53 C54 H54A 110.7 . . ?
C53 C54 H54B 108.5 . . ?
H54A C54 H54B 109.4 . . ?
C53 C54 H54C 109.3 . . ?
H54A C54 H54C 109.4 . . ?
H54B C54 H54C 109.6 . . ?
C53 C55 C56 122.7(12) . . ?
C53 C55 H55 116.3 . . ?
C56 C55 H55 121.0 . . ?
C55 C56 C50 118.2(12) . . ?
C55 C56 Ir2 126.6(10) . . ?
C50 C56 Ir2 115.0(9) . . ?
C58 C57 C63 117.3(12) . . ?
C58 C57 Ir2 127.6(9) . . ?
C63 C57 Ir2 115.1(9) . . ?
C59 C58 C57 123.7(13) . . ?
C59 C58 H58 121.0 . . ?
C57 C58 H58 115.3 . . ?
C58 C59 C61 118.8(13) . . ?
C58 C59 C60 122.2(13) . . ?
C61 C59 C60 118.8(13) . . ?
C59 C60 H60A 107.7 . . ?
C59 C60 H60B 112.2 . . ?
H60A C60 H60B 109.5 . . ?
C59 C60 H60C 108.5 . . ?
H60A C60 H60C 109.4 . . ?
H60B C60 H60C 109.5 . . ?
C62 C61 C59 119.8(12) . . ?
C62 C61 H61 120.4 . . ?
C59 C61 H61 119.8 . . ?
C61 C62 C63 122.1(12) . . ?
C61 C62 H62 118.2 . . ?
C63 C62 H62 119.7 . . ?
C62 C63 C57 118.1(12) . . ?
C62 C63 C64 127.0(11) . . ?
C57 C63 C64 114.7(11) . . ?
N4 C64 C63 113.1(11) . . ?
N4 C64 C65 118.4(13) . . ?
C63 C64 C65 128.5(13) . . ?
C66 C65 C71 118.5(12) . . ?
C66 C65 C64 122.9(13) . . ?
C71 C65 C64 118.4(13) . . ?
C67 C66 C65 119.9(14) . . ?
C67 C66 H66 119.9 . . ?
C65 C66 H66 120.2 . . ?
C66 C67 O6 115.0(13) . . ?
C66 C67 C69 122.4(14) . . ?
O6 C67 C69 122.6(13) . . ?
O6 C68 H68A 108.8 . . ?
O6 C68 H68B 110.3 . . ?
H68A C68 H68B 109.4 . . ?
O6 C68 H68C 109.4 . . ?
H68A C68 H68C 109.4 . . ?
H68B C68 H68C 109.5 . . ?
C70 C69 C67 117.9(13) . . ?
C70 C69 H69 119.4 . . ?
C67 C69 H69 122.7 . . ?
C69 C70 C71 121.7(13) . . ?
C69 C70 H70 120.5 . . ?
C71 C70 H70 117.9 . . ?
C72 C71 C70 121.7(14) . . ?
C72 C71 C65 119.0(13) . . ?
C70 C71 C65 119.2(13) . . ?
C73 C72 C71 120.7(14) . . ?
C73 C72 H72 119.5 . . ?
C71 C72 H72 119.8 . . ?
C72 C73 N4 121.5(14) . . ?
C72 C73 H73 120.4 . . ?
N4 C73 H73 118.1 . . ?
O7 C74 C76 125.7(14) . . ?
O7 C74 C75 114.8(13) . . ?
C76 C74 C75 119.5(14) . . ?
C74 C75 H75A 111.4 . . ?
C74 C75 H75B 107.9 . . ?
H75A C75 H75B 109.5 . . ?
C74 C75 H75C 109.3 . . ?
H75A C75 H75C 109.3 . . ?
H75B C75 H75C 109.4 . . ?
C77 C76 C74 128.4(16) . . ?
C77 C76 H76 119.3 . . ?
C74 C76 H76 112.2 . . ?
O8 C77 C76 127.8(14) . . ?
O8 C77 C78 112.7(13) . . ?
C76 C77 C78 119.5(15) . . ?
C77 C78 H78A 110.3 . . ?
C77 C78 H78B 110.4 . . ?
H78A C78 H78B 109.5 . . ?
C77 C78 H78C 107.8 . . ?
H78A C78 H78C 109.4 . . ?
H78B C78 H78C 109.5 . . ?
 
_diffrn_measured_fraction_theta_max    0.999
_diffrn_reflns_theta_full              25.02
_diffrn_measured_fraction_theta_full   0.999
_refine_diff_density_max    0.975
_refine_diff_density_min   -2.001
_refine_diff_density_rms    0.376
